# Supplementary material for: Ru(ii) water oxidation catalysts with 2,3-bis(2-pyridyl)pyrazine and tris(pyrazolyl)methane ligands: assembly of photo-active and catalytically active subunits in a dinuclear structure
Source: Royal Society of Chemistry journal article supplement (doi:10.1039/c9dt04815d), 2020-01-01
Supplement: c9dt04815d1.pdf [file c9dt04815d1.pdf]

# Ru(II) Water Oxidation Catalysts with 2,3-bis(2-Pyridyl)Pyrazine and tris(Pyrazolyl)Methane Ligands: Assembly of Photo- and Catalytic-Active Subunits in a Dinuclear Structure

Alice de Palo, Giuseppina La Ganga, Francesco Nastasi, Massimo Guelfi, Marco  
Bortoluzzi, Guido Pampaloni, Fausto Puntoriero, Sebastiano Campagna and Fabio  
Marchetti

## Supporting Information

| <b><u>Table of contents</u></b>                                                                                                                                                                                         | <i>Page</i> |
|-------------------------------------------------------------------------------------------------------------------------------------------------------------------------------------------------------------------------|-------------|
| <b>Figure S1.</b> DFT-optimized geometries of the diastereoisomers [3A] <sup>3+</sup> and [3B] <sup>3+</sup>                                                                                                            | S3          |
| <b>Figure S2.</b> DFT-optimized geometry of [1] <sup>+</sup>                                                                                                                                                            | S4          |
| <b>Figure S3.</b> DFT-optimized geometry of [1 <sup>WA</sup> ] <sup>+</sup> and [1 <sup>WB</sup> ] <sup>+</sup>                                                                                                         | S5          |
| <b>Figure S4.</b> DFT-optimized geometry of [2 <sup>AN</sup> ] <sup>+</sup>                                                                                                                                             | S6          |
| <b>Figure S5.</b> DPV at different pH of a solution of [1]PF <sub>6</sub>                                                                                                                                               | S7          |
| <b>Figure S6.</b> Spectrophotometric titration of a solution of [1]PF <sub>6</sub> by adding CAN in HClO <sub>4</sub> 0.1 M.                                                                                            | S8          |
| <b>Figure S7.</b> Absorbance changes of [1]PF <sub>6</sub> upon addition of 3 eq of CAN in HClO <sub>4</sub> 0.1 M.                                                                                                     | S8          |
| <b>Figure S8.</b> Absorbance changes of [1]PF <sub>6</sub> upon addition of 30 eq of CAN in HClO <sub>4</sub> 0.1 M and k <sub>obs</sub> vs catalyst concentration.                                                     | S9          |
| <b>Figure S9.</b> Absorbance changes of [2]Cl upon addition of 3 eq of CAN in HClO <sub>4</sub> 0.1 M.                                                                                                                  | S9          |
| <b>Figure S10.</b> CV of [3]PF <sub>6</sub> in 1:1 (v/v) acetonitrile/phosphate buffer (pH 7)                                                                                                                           | S10         |
| <b>Figure S11.</b> Oxygen evolution vs time at different concentration of [3]PF <sub>6</sub> in HClO <sub>4</sub> 0.1 M, in presence of CAN and initial rate of oxygen production as function of catalyst concentration | S10         |
| <b>Figure S12.</b> Absorbance changes of [3]PF <sub>6</sub> upon addition of 30 eq of CAN in HClO <sub>4</sub> 0.1 M and k <sub>obs</sub> vs catalyst concentration.                                                    | S11         |
| <b>Figure S13</b> Absorbance changes of [2]Cl upon addition of 30 eq of CAN in HClO <sub>4</sub> 0.1 M and k <sub>obs</sub> vs catalyst concentration.                                                                  | S11         |

|                                                                                                                                                                                                            |     |
|------------------------------------------------------------------------------------------------------------------------------------------------------------------------------------------------------------|-----|
| <b>Figure S14.</b> Absorbance changes of [3]PF <sub>6</sub> upon addition of 3 eq of CAN in HClO <sub>4</sub> 0.1 M.                                                                                       | S12 |
| <b>Figure S15.</b> Oxygen evolution vs time at different concentration of [1]PF <sub>6</sub> in HClO <sub>4</sub> 0.1 M, in presence of CAN                                                                | S12 |
| <b>Figure S16.</b> Spectrophotometric titration of a solution of [2]Cl by adding CAN in HClO <sub>4</sub> 0.1 M.                                                                                           | S13 |
| <b>Figure S17.</b> Oxygen evolution vs time at different concentration of [2]Cl in HClO <sub>4</sub> 0.1 M, in presence of CAN and initial rate of oxygen production as function of catalyst concentration | S13 |
| <b>Figure S18.</b> Spectrophotometric titration of a solution of [3]PF <sub>6</sub> by adding CAN in HClO <sub>4</sub> 0.1 M.                                                                              | S13 |
| <b>Figure S19.</b> DPV of [2]Cl (1.2 x 10 <sup>-4</sup> M) at different pH.                                                                                                                                | S14 |
| <b>Figure S20.</b> CV of [2]Cl in 0.1 M phosphate buffer at pH 7.0 with addition of increasing amounts of NaCl                                                                                             | S15 |
| <b>Figure S21.</b> Plot of $i_{cat}$ at 1.65 V vs. [NaCl] for [2]Cl                                                                                                                                        | S15 |

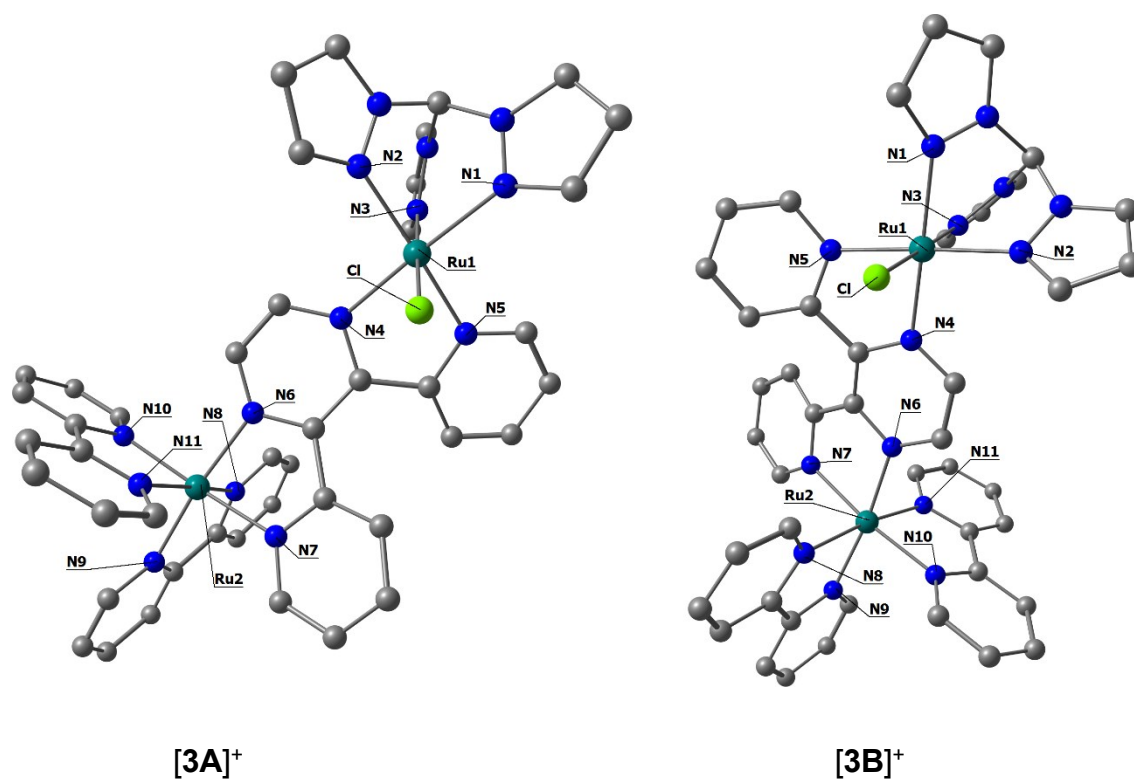

**Figure S1.** DFT-optimized geometries of the diastereoisomers  $[3A]^{3+}$  and  $[3B]^{3+}$  (C-PCM/ $\omega$ B97X calculations, dichloromethane as continuous medium). Colour map: Ru, dark green; Cl, light green; N, blue; C, grey. Hydrogen atoms are omitted for clarity.

Selected computed lengths (Å) for  $[3B]^{3+}$ : Ru1-Cl 2.414; Ru1-N1 2.111; Ru1-N2 2.110; Ru1-N3 2.093; Ru1-N4 2.061; Ru1-N5 2.090; Ru2-N6 2.089; Ru2-N7 2.096; Ru2-N8 2.106; Ru2-N9 2.096; Ru2-N10 2.098; Ru2-N11 2.104. Selected computed angles (°) for  $[3B]^{3+}$ : Cl-Ru1-N1 91.6; Cl-Ru1-N2 90.9; Cl-Ru1-N3 176.4; Cl-Ru1-N4 89.8; Cl-Ru1-N5 87.4; N6-Ru2-N7 77.9; N6-Ru2-N8 96.0; N6-Ru2-N9 172.5; N6-Ru2-N10 97.4; N6-Ru2-N11 89.7.

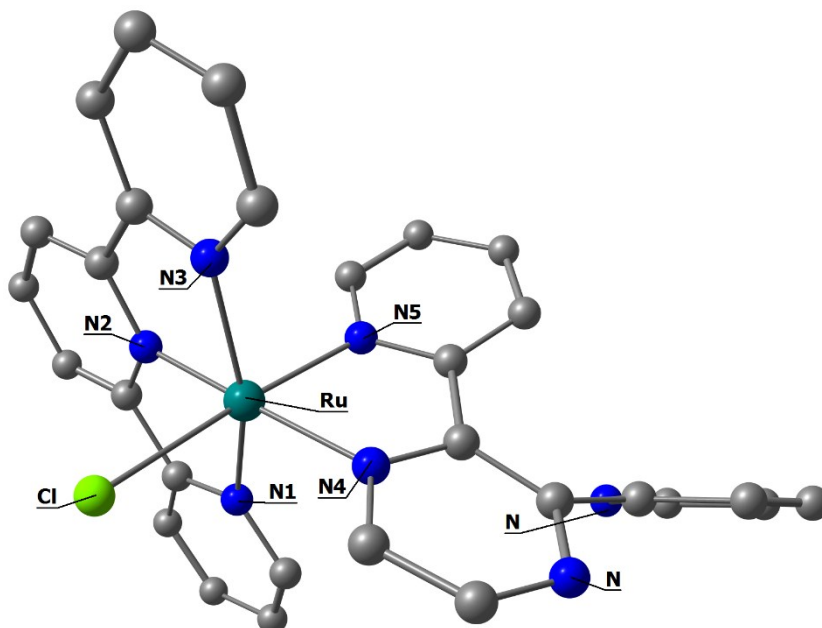

**Figure S2.** DFT-optimized geometry of  $[1]^+$  (C-PCM/ $\omega$ B97X calculations, water as continuous medium). Colour map: Ru, dark green; Cl, light green; N, blue; C, grey. Hydrogen atoms are omitted for clarity.

Selected computed lengths ( $\text{\AA}$ ) for  $[1]^+$ : Ru-Cl 2.414; Ru-N1 2.108; Ru-N2 1.984; Ru-N3 2.103; Ru-N4 2.100; Ru-N5 2.076. Selected computed angles ( $^\circ$ ) for  $[1]^+$ : Cl-Ru-N1 90.0; Cl-Ru-N2 87.9; Cl-Ru-N3 89.8; Cl-Ru-N4 95.2; Cl-Ru-N5 172.7.

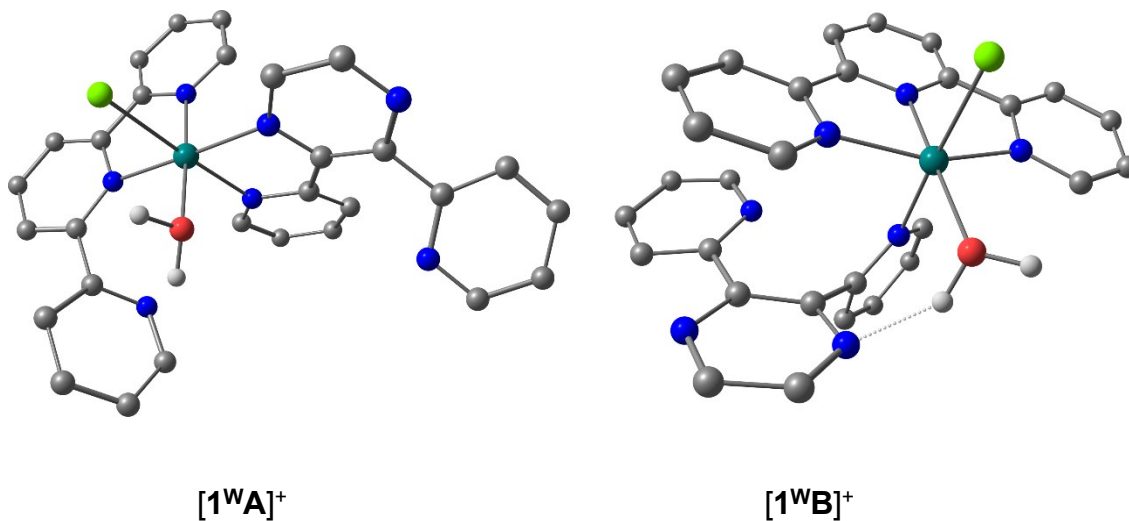

**Figure S3.** DFT-optimized geometry of [1<sup>WA</sup>]<sup>+</sup> and [1<sup>WB</sup>]<sup>+</sup> (C-PCM/ $\omega$ B97X calculations, water as continuous medium). Colour map: Ru, dark green; Cl, light green; N, blue; C, grey. Hydrogen atoms, except for those of coordinated water, are omitted for clarity.

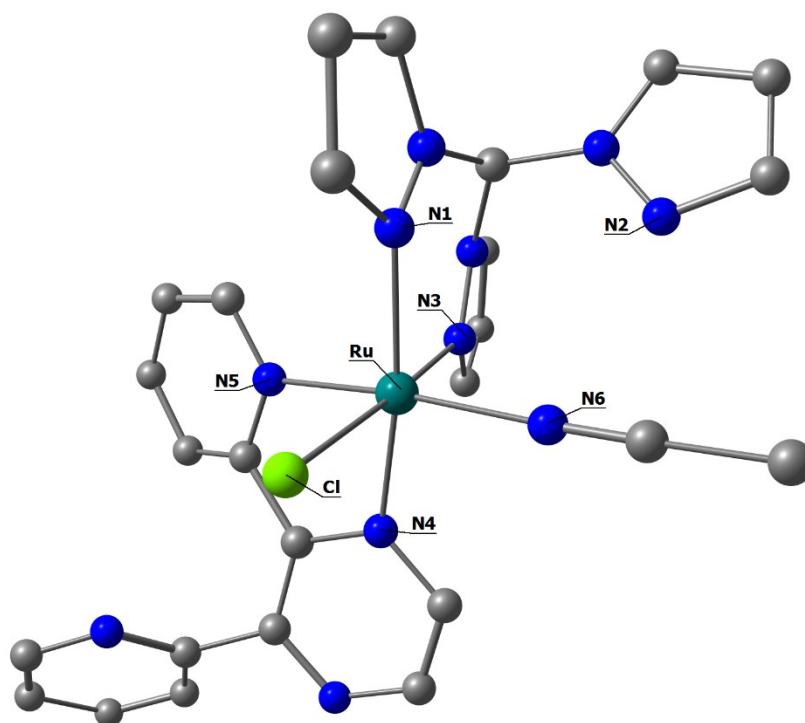

**Figure S4.** DFT-optimized geometry of  $[2^{AN}]^+$  (C-PCM/ $\omega$ B97X calculations, acetonitrile as continuous medium). Colour map: Ru, dark green; Cl, light green; N, blue; C, grey. Hydrogen atoms are omitted for clarity.

Selected computed lengths (Å) for  $[2^{AN}]^+$ : Ru-Cl 2.444; Ru-N1 2.116; Ru-N3 2.103; Ru-N4 2.070; Ru-N5 2.081; Ru-N6 2.042. Selected computed angles (°) for  $[2^{AN}]^+$ : Cl-Ru-N1 91.7; Cl-Ru-N3 176.5; Cl-Ru-N4 85.4; Cl-Ru-N5 90.5; Cl-Ru-N6 89.3.

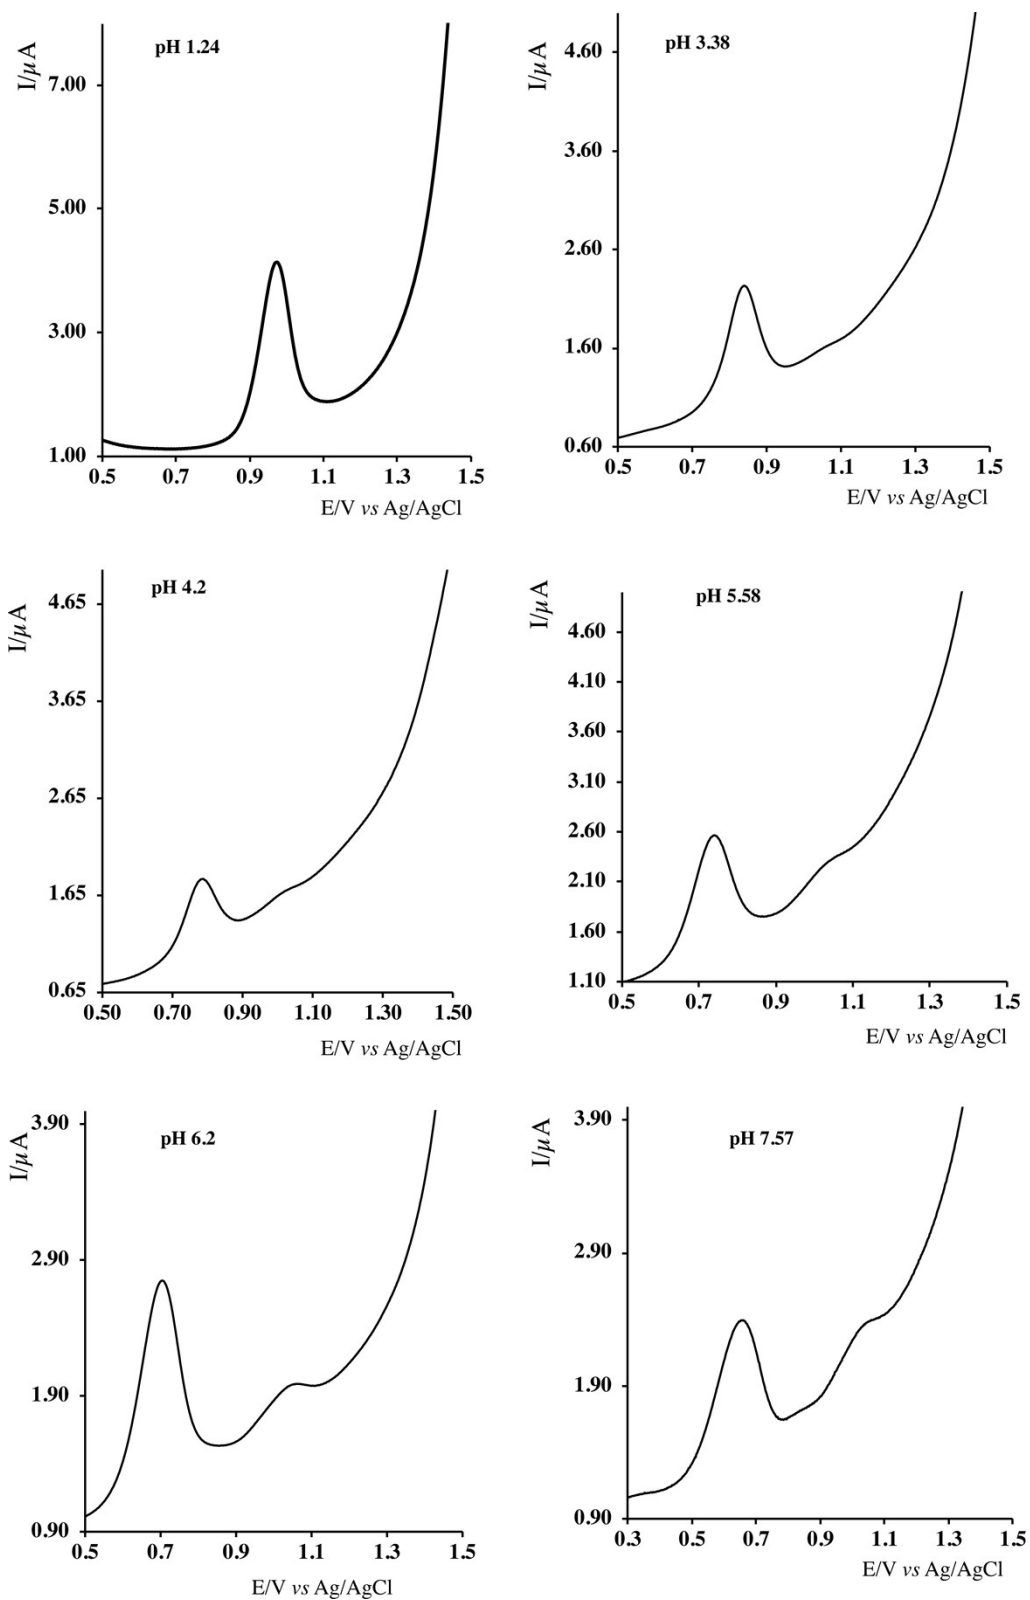

**Figure S5.** DPV of  $[1]\text{PF}_6$  ( $1.2 \times 10^{-4}$  M) at different pH that were adjusted by adding small amounts of  $\text{NaOH}(\text{sol})$  to a 0.1 M  $\text{HClO}_4$  solution and determined by a pH-meter. Glassy carbon was used as working electrode, platinum as counter and  $\text{Ag}/\text{AgCl}$  as reference. Scan rate 20 mV/s.

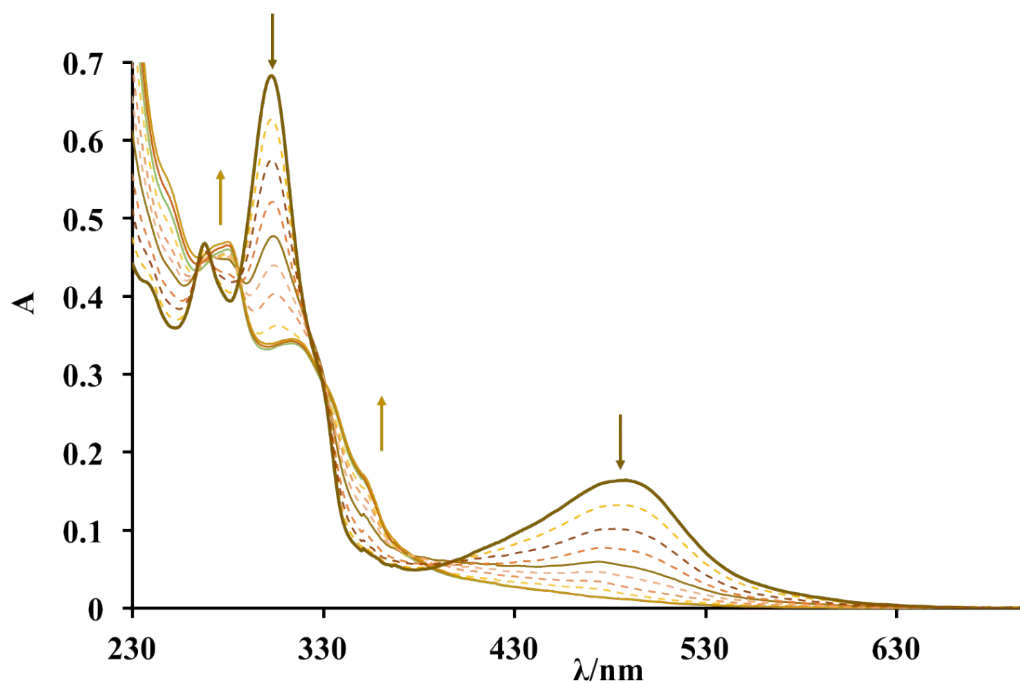

**Figure S6.** Spectral changes upon addition of CAN ( $5 \times 10^{-3} \text{M}$ ) to a solution of  $[\mathbf{1}]\text{PF}_6$  ( $2 \times 10^{-5} \text{M}$ ) in  $\text{HClO}_4$  0.1 M. Solid lines refer to  $[\text{CAN}]/[\mathbf{1}]$  ratio 0, 1 and 2 respectively.

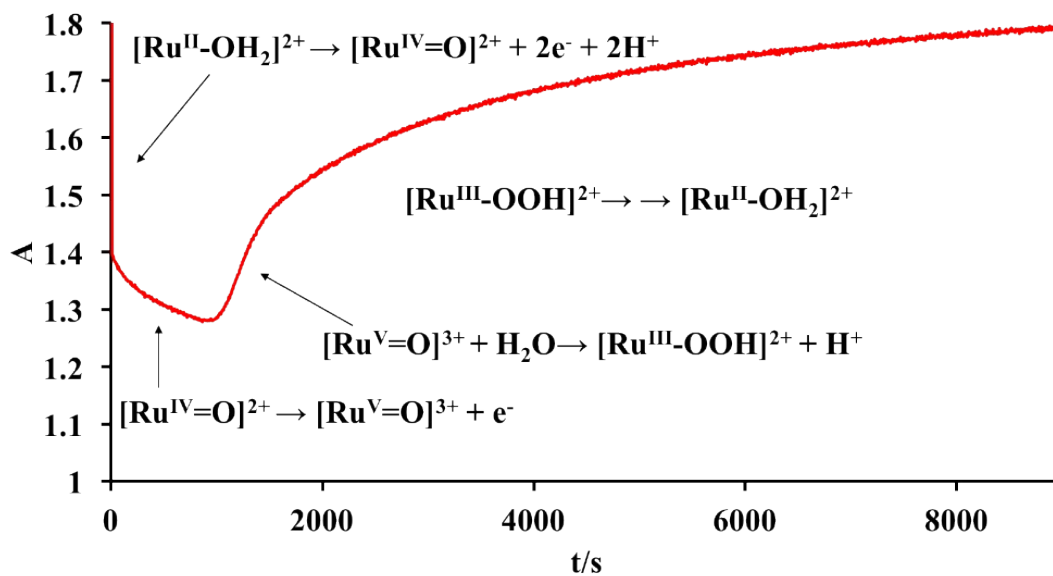

**Figure S7.** Absorbance changes at 305 nm upon addition of three equivalents of CAN to a solution of  $[\mathbf{1}]\text{PF}_6$  ( $5 \times 10^{-5} \text{M}$ ) in  $\text{HClO}_4$  0.1 M.



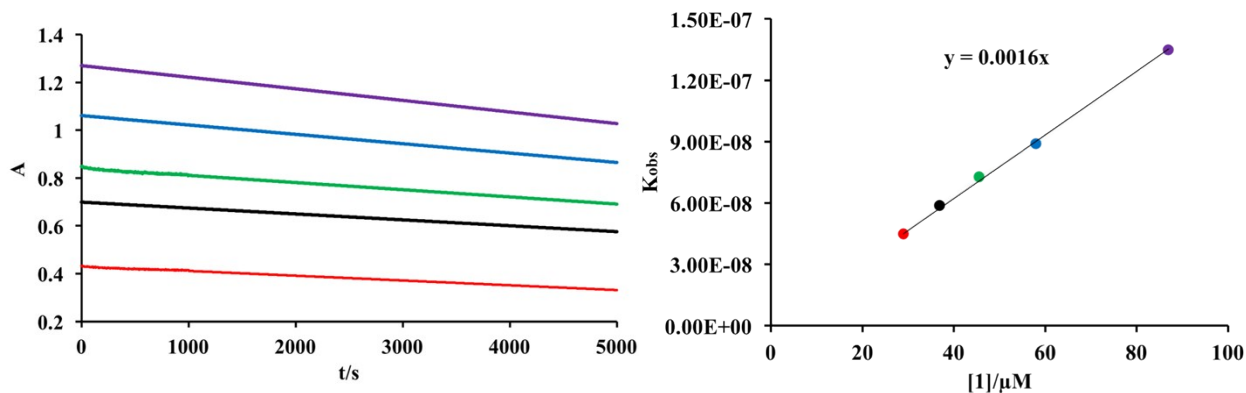

**Figure S8.** Left side: Absorbance changes at 360 nm upon addition of 30 equivalents of CAN to a solution of [1]PF<sub>6</sub> at different concentrations (29, 37, 46, 58 e 87 μM) in HClO<sub>4</sub> 0.1 M. Right side: k<sub>obs</sub> vs catalyst concentration.

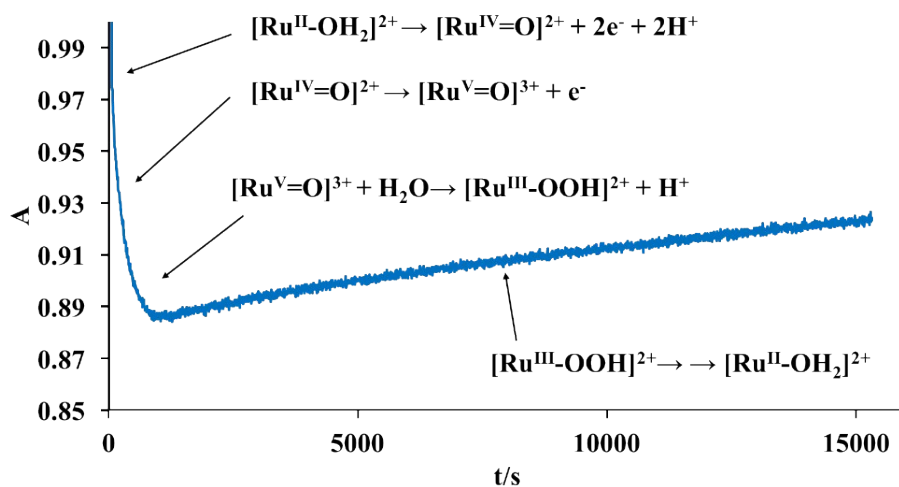

**Figure S9.** Absorbance changes at 305 nm upon addition of 3 equivalents of CAN to a solution of [2]Cl ( $5 \times 10^{-5}$  M) in HClO<sub>4</sub> 0.1 M.

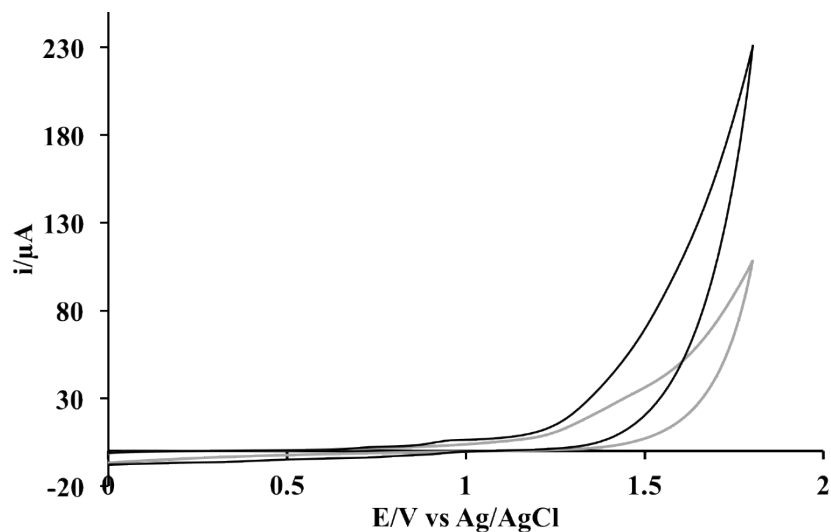

**Figure S10.** Cyclic voltammograms of  $[3][PF_6]_3$  (black line) in the range 0.0-2.0 V vs Ag/AgCl in 1:1 (v/v) acetonitrile/phosphate buffer (pH 7) (glassy carbon working electrode, scan rate of 50 mV/s). In grey CV of solvent is reported.

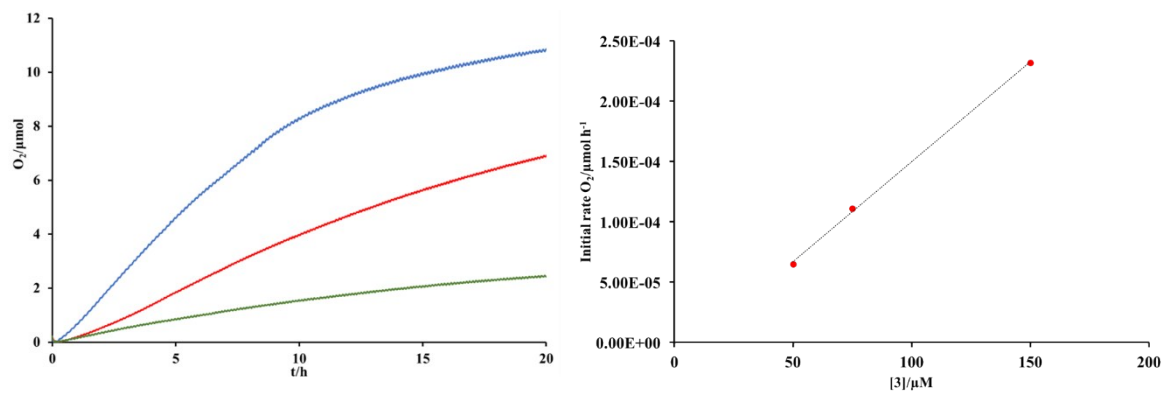

**Figure S11.** Left side: O<sub>2</sub> evolution vs time at different concentration of  $[3][PF_6]_3$  in HClO<sub>4</sub> 0.1 M, in presence of CAN (200 mM); Right side: Initial rate of O<sub>2</sub> production as function of catalyst concentration ( $[3][PF_6]_3$ ) (50, 75 and 150 μM).

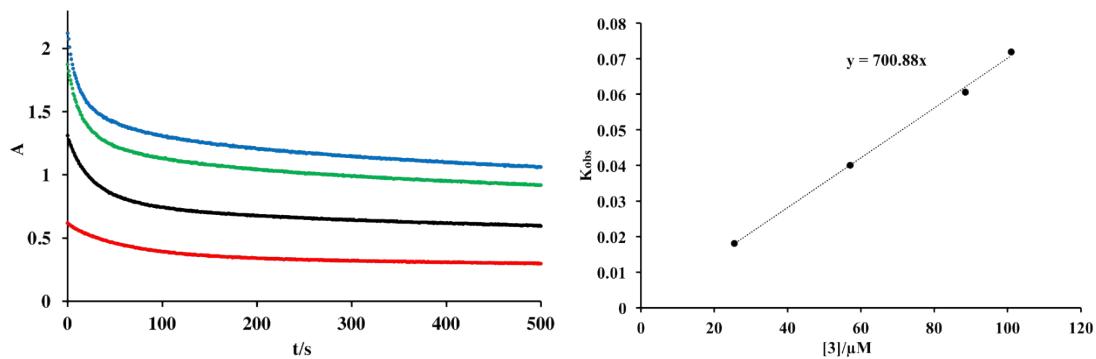

**Figure S12.** Left side: Absorbance changes at 360 nm upon addition of 30 equivalent of CAN to a solution of [3][PF<sub>6</sub>]<sub>3</sub> at different concentrations (26, 58, 89 e 100 μM) in HClO<sub>4</sub> 0.1 M; right side: k<sub>obs</sub> vs catalyst concentration (3).

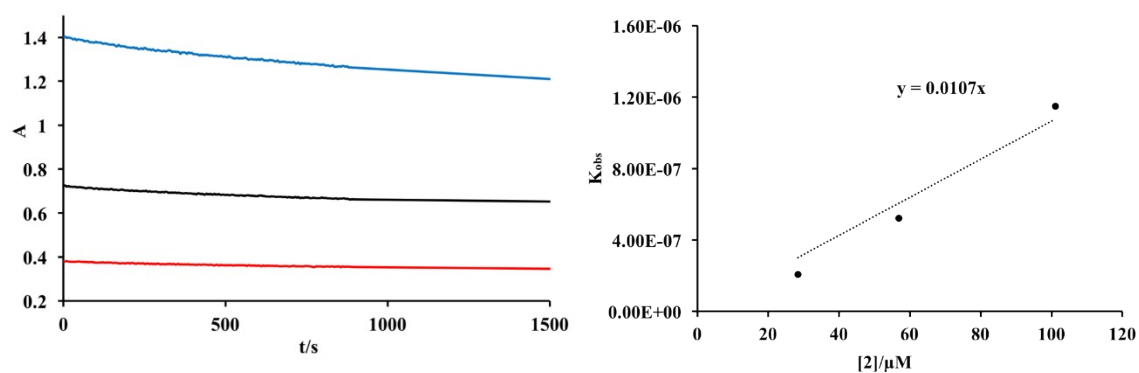

**Figure S13.** Left side: Absorbance changes at 360 nm upon addition of 30 equivalent of CAN to a solution of [2]Cl at different concentrations (28, 57, 100 μM) in HClO<sub>4</sub> 0.1 M; right side: k<sub>obs</sub> vs catalyst concentration (2).

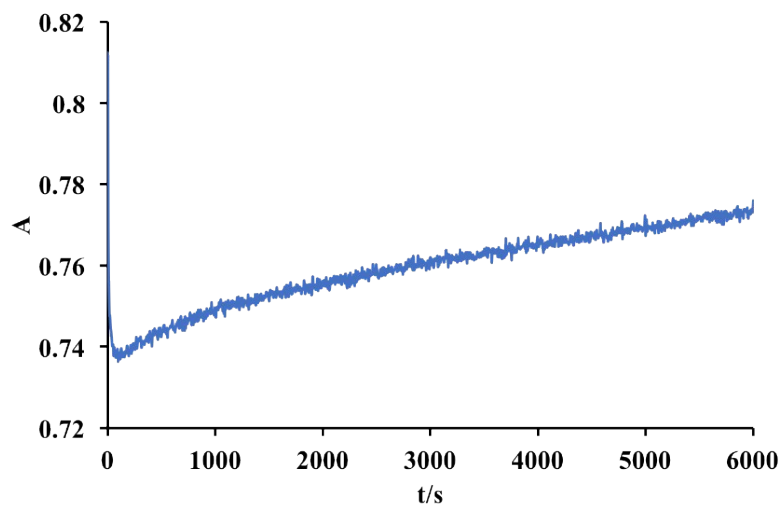

**Figure S14.** Absorbance changes at 305 nm upon addition of 3 equivalents of CAN to a solution of  $[3][PF_6]_3$  ( $5 \times 10^{-5} M$ ) in  $HClO_4$  0.1 M.

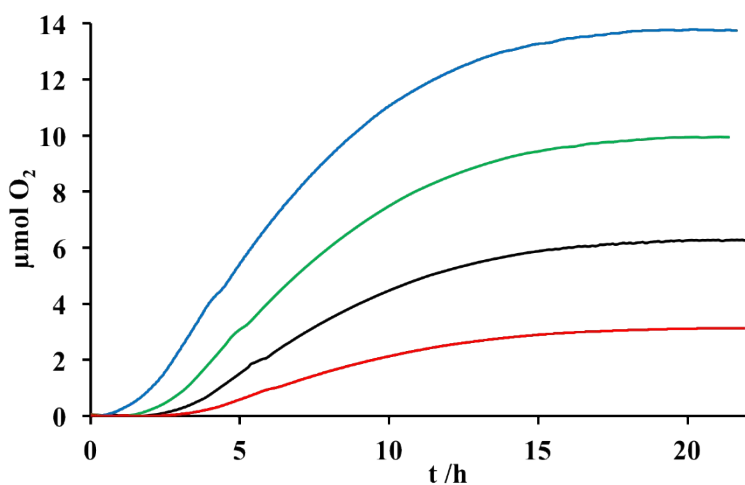

**Figure S15.**  $O_2$  evolution vs time at different concentrations (47, 94, 145 e 190  $\mu M$ ) of  $[1]PF_6$  in  $HClO_4$  0.1 M, in the presence of CAN (200 mM).

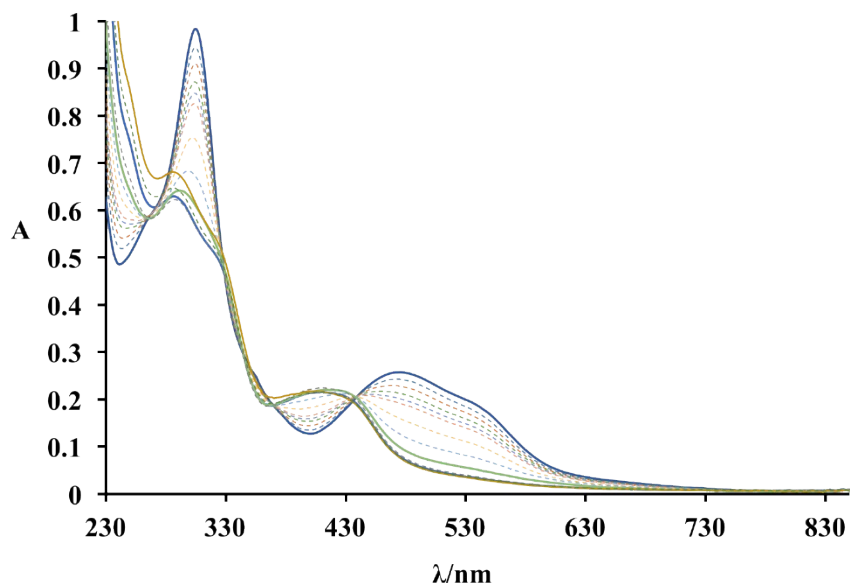

**Figure S16.** Spectral changes upon addition of CAN ( $5 \times 10^{-3} \text{M}$ ) to a solution of  $[2]\text{Cl}$  ( $2 \times 10^{-5} \text{M}$ ) in  $\text{HClO}_4$  0.1 M. Solid lines refer to  $[\text{CAN}]/[1]$  ratios 0, 1 and 2 respectively.

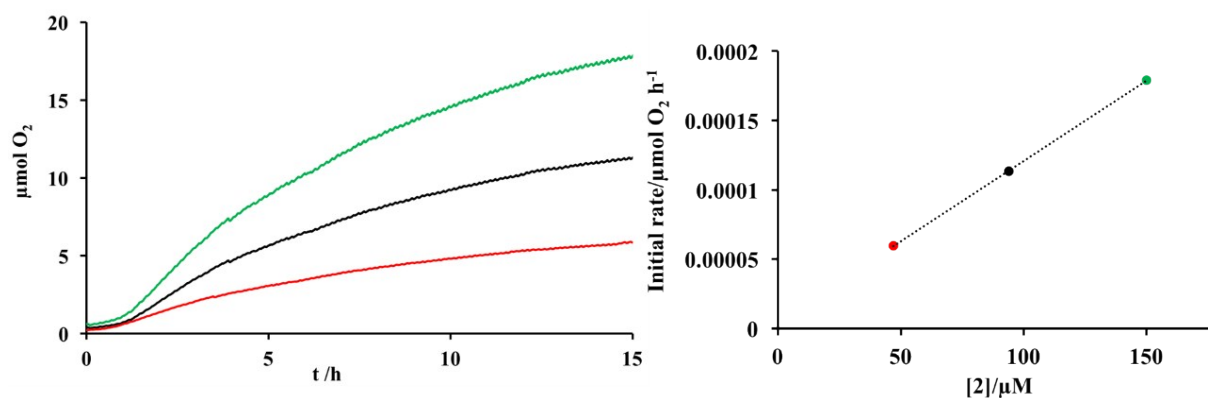

**Figure S17.** Left side:  $\text{O}_2$  evolution vs time at different concentration of  $[2]\text{Cl}$  in  $\text{HClO}_4$  0.1 M, in presence of CAN (200 mM). Right side: Initial rate of  $\text{O}_2$  production as function of catalyst concentration ( $[2]\text{Cl}$ ) (47, 94 and 145  $\mu\text{M}$ ).

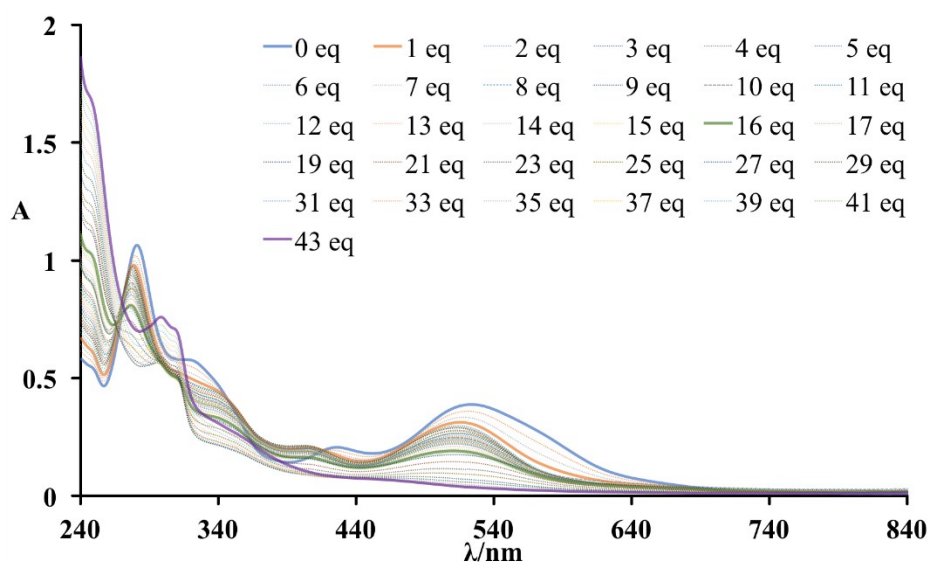

**Figure S18.** Spectral changes upon addition of CAN ( $5.2 \times 10^{-3} \text{M}$ ) to a solution of  $[3][\text{PF}_6]_3$  ( $2.5 \times 10^{-5} \text{M}$ ) in  $\text{HClO}_4$  0.1 M.

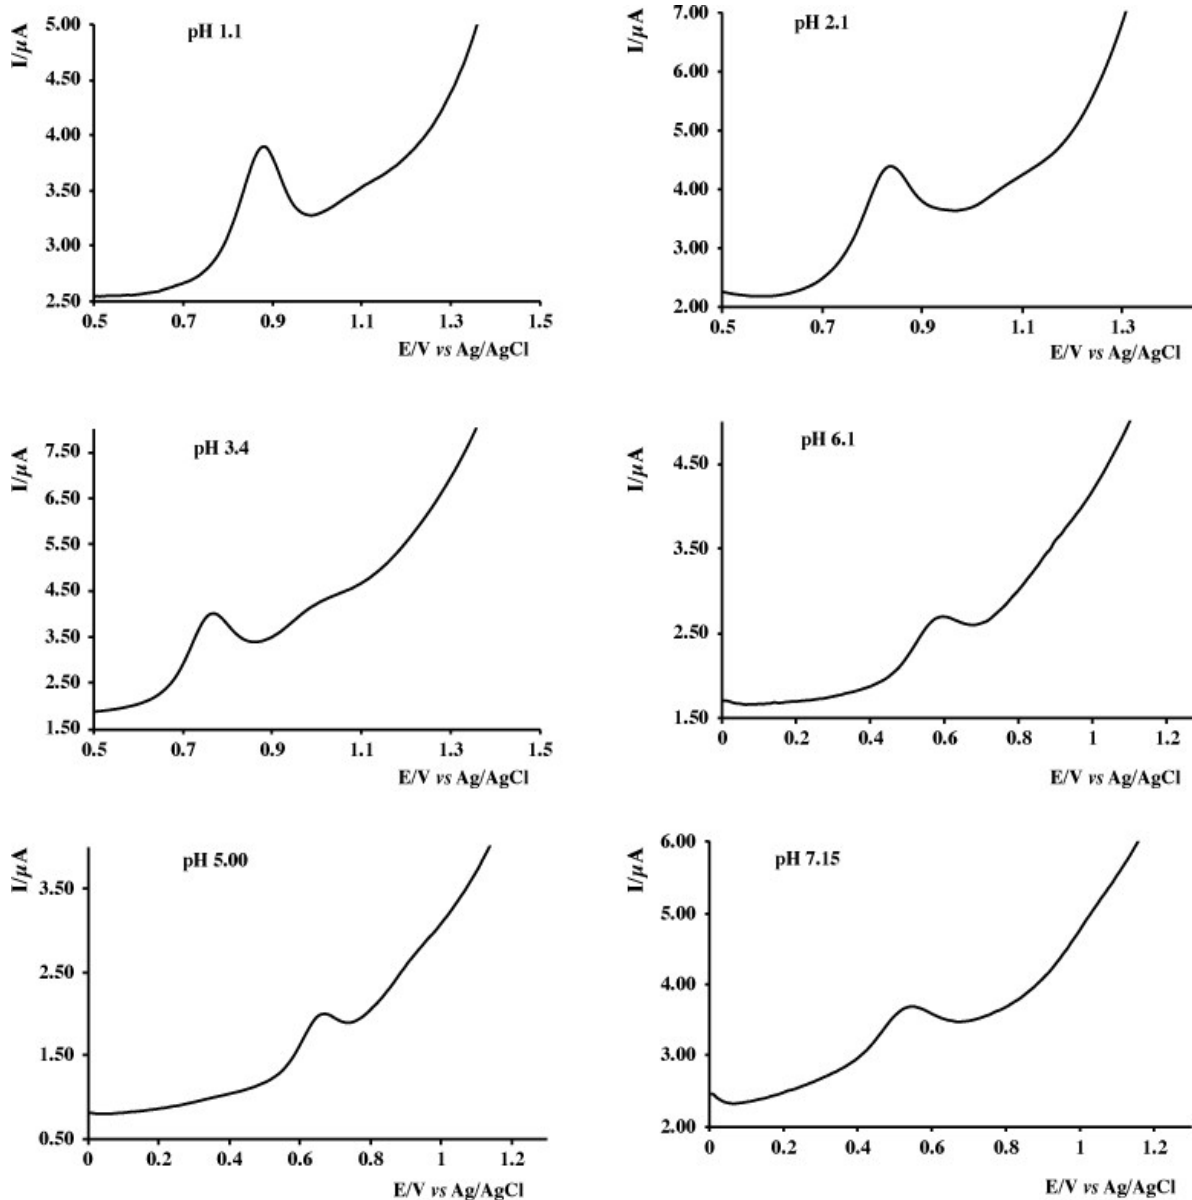

**Figure S19.** DPV of  $[2]Cl_6$  ( $1.2 \times 10^{-4}$  M) at different pH that were adjusted by adding small amounts of NaOH(s) to a 0.1 M  $HClO_4$  solution and determined by a pH-meter. Glassy carbon was used as working electrode, platinum as counter and Ag/AgCl as reference. Scan rate 20 mV/s.

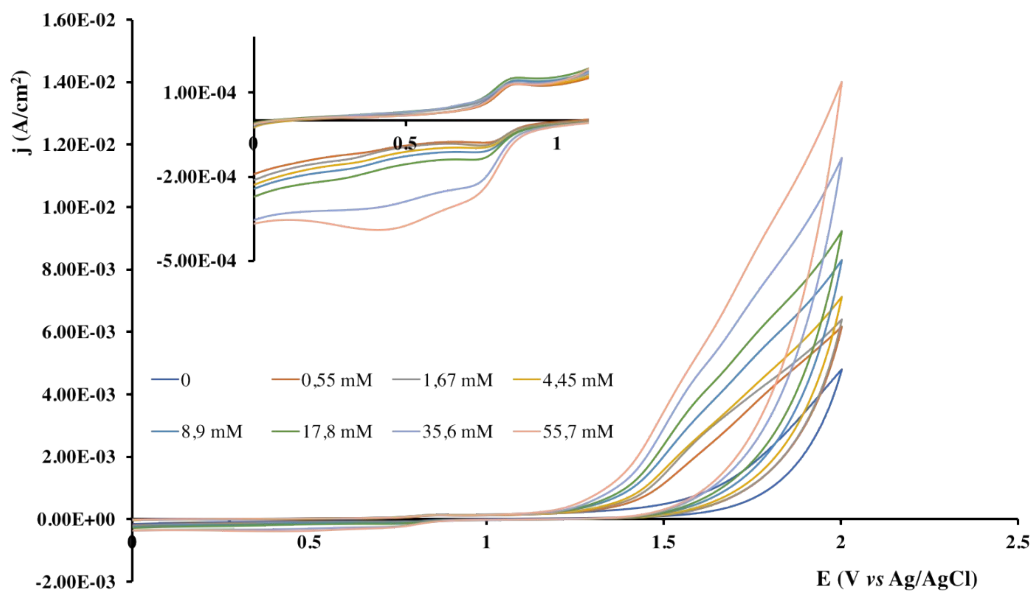

**Figure S20.** CV of [2]Cl (1 mM) in 0.1 M phosphate buffer at pH 7.0 with increasing amounts of NaCl. The inset shows a magnified view in the potential range for the Ru(III/II) and Ru(IV/III) couples. Electrode: glassy carbon; scan rate = 100 mV s<sup>-1</sup>.

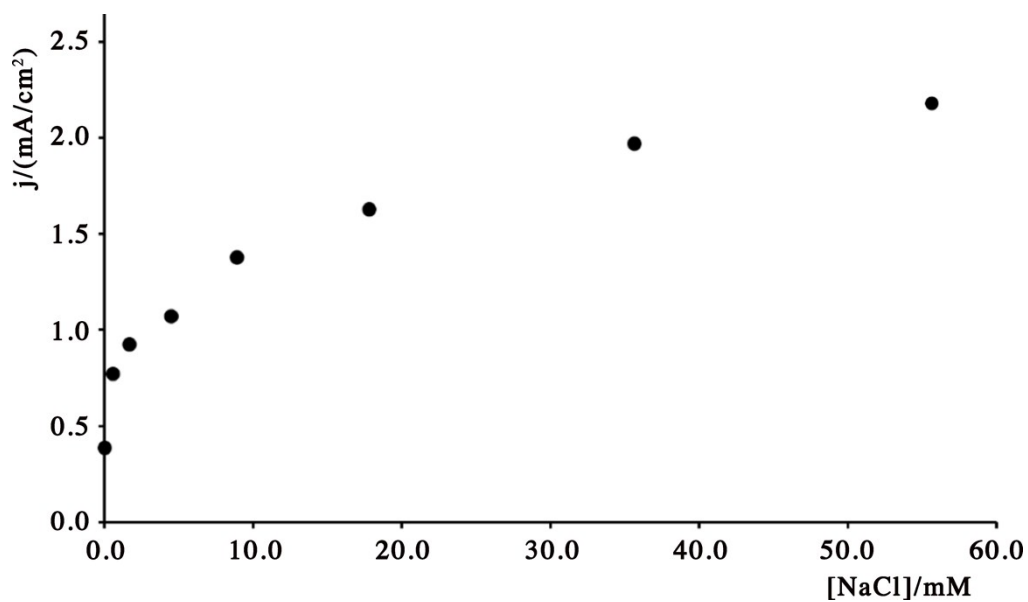

**Figure S21.** Plot of  $i_{cat}$  at 1.65 V vs. [NaCl] for [2]Cl
